# Supplementary material for: Nivolumab plus ipilimumab versus sunitinib for first-line treatment of advanced renal cell carcinoma: extended 4-year follow-up of the phase III CheckMate 214 trial
Source: PubMed Central journal article supplement — ESMO Open. 2020 Nov 27;5(6):e001079. doi: 10.1136/esmoopen-2020-001079 (PMC7703447; doi:10.1136/esmoopen-2020-001079), 2020-11-27
Supplement: esmoopen-2020-001079supp001.pdf [file esmoopen-2020-001079supp001.pdf]

## Supporting Materials

**Supporting Table 1** Baseline characteristics in ITT patients

| Characteristic*                                    | Intent-to-treat <sup>1,2</sup> |                |
|----------------------------------------------------|--------------------------------|----------------|
|                                                    | NIVO+IPI<br>(N=550)            | SUN<br>(N=546) |
| Median age (range), years                          | 62 (26–85)                     | 62 (21–85)     |
| Sex, n (%)                                         |                                |                |
| Male                                               | 413 (75)                       | 395 (72)       |
| Female                                             | 137 (25)                       | 151 (28)       |
| IMDC prognostic score, n (%)                       |                                |                |
| Favourable (0)                                     | 125 (23)                       | 124 (23)       |
| Intermediate (1–2)                                 | 334 (61)                       | 333 (61)       |
| Poor (3–6)                                         | 91 (17)                        | 89 (16)        |
| Region, n (%)                                      |                                |                |
| United States                                      | 154 (28)                       | 153 (28)       |
| Canada/Europe                                      | 201 (37)                       | 199 (36)       |
| Rest of the world                                  | 195 (35)                       | 194 (36)       |
| Prior radiotherapy, n (%)                          | 63 (11)                        | 70 (13)        |
| Prior nephrectomy, n (%)                           | 453 (82)                       | 437 (80)       |
| No. of sites with target/nontarget lesions, n (%)† |                                |                |
| 1                                                  | 123 (22)                       | 118 (22)       |
| ≥2                                                 | 427 (78)                       | 427 (78)       |
| Quantifiable tumour PD-L1 expression, n (%)        | N=499                          | N=503          |
| <1%                                                | 386 (77)                       | 376 (75)       |
| ≥1%                                                | 113 (23)                       | 127 (25)       |

\*Information shown in the table is based on data collected with the use of an interactive voice-response system.

†The number of target or nontarget lesions at baseline was not reported for one patient in the SUN arm.

IMDC, International Metastatic Renal Cell Carcinoma Database Consortium; NIVO+IPI, nivolumab plus ipilimumab; PD-L1, programmed death ligand 1; SUN, sunitinib.

**Supporting Table 2** Subsequent therapy in ITT, I/P-risk and FAV-risk patients

| Therapy                                        | Intent-to-treat     |                | Intermediate/poor risk |                | Favourable risk     |                |
|------------------------------------------------|---------------------|----------------|------------------------|----------------|---------------------|----------------|
|                                                | NIVO+IPI<br>(N=550) | SUN<br>(N=546) | NIVO+IPI<br>(N=425)    | SUN<br>(N=422) | NIVO+IPI<br>(N=125) | SUN<br>(N=124) |
| Any subsequent therapy, n (%) <sup>*,†,‡</sup> | 330 (60.0)          | 382 (70.0)     | 249 (58.6)             | 289 (68.5)     | 81 (64.8)           | 93 (75.0)      |
| Subsequent systemic therapy, n (%)§            | 294 (53.5)          | 363 (66.5)     | 218 (51.3)             | 272 (64.5)     | 76 (60.8)           | 91 (73.4)      |
| PD-(L)1 inhibitor, n (%)                       |                     |                |                        |                |                     |                |
| Nivolumab                                      | 54 (9.8)            | 219 (40.1)     | 33 (7.8)               | 157 (37.2)     | 21 (16.8)           | 62 (50.0)      |
| Pembrolizumab                                  | 10 (1.8)            | 14 (2.6)       | 7 (1.6)                | 8 (1.9)        | 3 (2.4)             | 6 (4.8)        |
| Atezolizumab                                   | 2 (0.4)             | 3 (0.5)        | 1 (0.2)                | 2 (0.5)        | 1 (0.8)             | 1 (0.8)        |
| Durvalumab                                     | 0                   | 3 (0.5)        | 0                      | 1 (0.2)        | 0                   | 2 (1.6)        |
| CTLA-4 inhibitor, n (%)                        |                     |                |                        |                |                     |                |
| Ipilimumab                                     | 3 (0.5)             | 17 (3.1)       | 3 (0.7)                | 11 (2.6)       | 0                   | 6 (4.8)        |
| Investigational antineoplastic                 | 0                   | 1 (0.2)        | 0                      | 1 (0.2)        | 0                   | 0              |
| VEGF(R) inhibitor, n (%)                       |                     |                |                        |                |                     |                |
| Aflibercept                                    | 0                   | 1 (0.2)        | 0                      | 1 (0.2)        | 0                   | 0              |
| Axitinib                                       | 99 (18.0)           | 136 (24.9)     | 76 (17.9)              | 105 (24.9)     | 23 (18.4)           | 31 (25.0)      |
| Bevacizumab                                    | 12 (2.2)            | 10 (1.8)       | 10 (2.4)               | 10 (2.4)       | 2 (1.6)             | 0              |
| Cabozantinib                                   | 89 (16.2)           | 89 (16.3)      | 63 (14.8)              | 62 (14.7)      | 26 (20.8)           | 27 (21.8)      |
| Lenvatinib                                     | 26 (4.7)            | 15 (2.7)       | 21 (4.9)               | 9 (2.1)        | 5 (4.0)             | 6 (4.8)        |
| Pazopanib                                      | 106 (19.3)          | 39 (7.1)       | 78 (18.4)              | 29 (6.9)       | 28 (22.4)           | 10 (8.1)       |
| Sorafenib                                      | 14 (2.5)            | 6 (1.1)        | 12 (2.8)               | 6 (1.4)        | 2 (1.6)             | 0              |
| Sunitinib                                      | 129 (23.5)          | 72 (13.2)      | 101 (23.8)             | 46 (10.9)      | 28 (22.4)           | 26 (21.0)      |
| mTOR inhibitor, n (%)                          |                     |                |                        |                |                     |                |
| Everolimus                                     | 52 (9.5)            | 70 (12.8)      | 42 (9.9)               | 54 (12.8)      | 10 (8.0)            | 16 (12.9)      |
| Temsirolimus                                   | 5 (0.9)             | 6 (1.1)        | 4 (0.9)                | 4 (0.9)        | 1 (0.8)             | 2 (1.6)        |

\*Patient may have received more than one type of subsequent therapy. Subsequent therapy was defined as therapy started on or after first dosing date (randomisation date if patient was never treated).

†Subsequent radiotherapy was given to 15.3% versus 14.3% (ITT), 15.1% versus 14.7% (I/P) and 16.0% versus 12.9% (FAV) of patients.

‡Subsequent surgery was given to 8.9% versus 4.9% (ITT), 7.8% versus 5.9% (I/P) and 12.8% versus 1.6% (FAV) of patients.

§Systemic therapies not included under PD-(L)1, CTLA-4, VEGF(R) or mTOR inhibitors include ALK/EGFR tyrosine kinase inhibitors, cancer vaccine, interferon, interferon alfa, interleukin, interleukin 2, investigational immunotherapy, capecitabine, carboplatin, cisplatin, cobimetinib, cyclophosphamide, doxorubicin, doxorubicin liposomal, epirubicin, etoposide, fluorouracil, gemcitabine, ibrutinib, infliximab, irinotecan, methotrexate, oxaliplatin, tegafur/uracil, vorinostat, investigational antineoplastic, investigational drug, radium 223, budesonide, candesartan, cimetidine, denosumab, medroxyprogesterone, meloxicam, selenium.

CTLA-1, cytotoxic T lymphocyte antigen-4; FAV, favourable risk; I/P, intermediate/poor risk; ITT, intent-to-treat; mTOR, mammalian target of rapamycin; NIVO+IPI, nivolumab plus ipilimumab; PD-(L)1, programmed death (ligand) 1; VEGF(R), vascular endothelial growth factor (receptor); SUN, sunitinib;

**Supporting Table 3** Summary of safety in all treated population

| <b>All treated patients</b>                                        |                             |                  |                        |                  |
|--------------------------------------------------------------------|-----------------------------|------------------|------------------------|------------------|
| <b>Safety parameters;<br/>patients, n (%)</b>                      | <b>NIVO+IPI<br/>(N=547)</b> |                  | <b>SUN<br/>(N=535)</b> |                  |
|                                                                    | <b>Any grade</b>            | <b>Grade 3–4</b> | <b>Any grade</b>       | <b>Grade 3–4</b> |
| <b>Treatment-related AEs</b>                                       | 514 (94)                    | 262 (48)         | 521 (97)               | 343 (64)         |
| <b>All treatment-related AEs (any grade &gt;20% in either arm)</b> |                             |                  |                        |                  |
| Fatigue                                                            | 209 (38)                    | 24 (4)           | 266 (50)               | 51 (10)          |
| Pruritus                                                           | 169 (31)                    | 3 (<1)           | 50 (9)                 | 0                |
| Diarrhoea                                                          | 155 (28)                    | 21 (4)           | 284 (53)               | 31 (6)           |
| Rash                                                               | 126 (23)                    | 10 (2)           | 70 (13)                | 0                |
| Nausea                                                             | 110 (20)                    | 8 (1)            | 208 (39)               | 7 (1)            |
| Hypothyroidism                                                     | 90 (16)                     | 2 (<1)           | 143 (27)               | 1 (<1)           |
| Decreased appetite                                                 | 76 (14)                     | 7 (1)            | 135 (25)               | 6 (1)            |
| Vomiting                                                           | 61 (11)                     | 4 (<1)           | 116 (22)               | 10 (2)           |
| Dysgeusia                                                          | 26 (5)                      | 0                | 118 (22)               | 1 (<1)           |
| Stomatitis                                                         | 25 (5)                      | 0                | 151 (28)               | 14 (3)           |
| Mucosal inflammation                                               | 15 (3)                      | 1 (<1)           | 155 (29)               | 15 (3)           |
| Hypertension                                                       | 12 (2)                      | 4 (<1)           | 220 (41)               | 91 (17)          |
| Palmoplantar erythema                                              | 6 (1)                       | 1 (<1)           | 234 (44)               | 50 (9)           |
| <b>All treatment-related select AEs<sup>a</sup></b>                |                             |                  |                        |                  |
| Gastrointestinal                                                   | 163 (30)                    | 28 (5)           | 284 (53)               | 31 (6)           |
| Hepatic                                                            | 107 (20)                    | 48 (9)           | 79 (15)                | 20 (4)           |
| Skin                                                               | 279 (51)                    | 22 (4)           | 308 (58)               | 55 (10)          |
| Endocrine                                                          | 180 (33)                    | 38 (7)           | 168 (31)               | 1 (<1)           |
| Pulmonary                                                          | 38 (7)                      | 6 (1)            | 2 (<1)                 | 0                |
| Renal                                                              | 56 (10)                     | 7 (1)            | 48 (9)                 | 6 (1)            |

AE, adverse event; NIVO+IPI, nivolumab plus ipilimumab; SUN, sunitinib.

<sup>a</sup>Treatment-related select AEs were prespecified and defined as events that might be immune-mediated, differ from those caused by non-immunotherapeutic drugs, might require immunosuppression for management and whose early recognition might mitigate severe toxicity.

**Supporting Figure 1** CONSORT diagram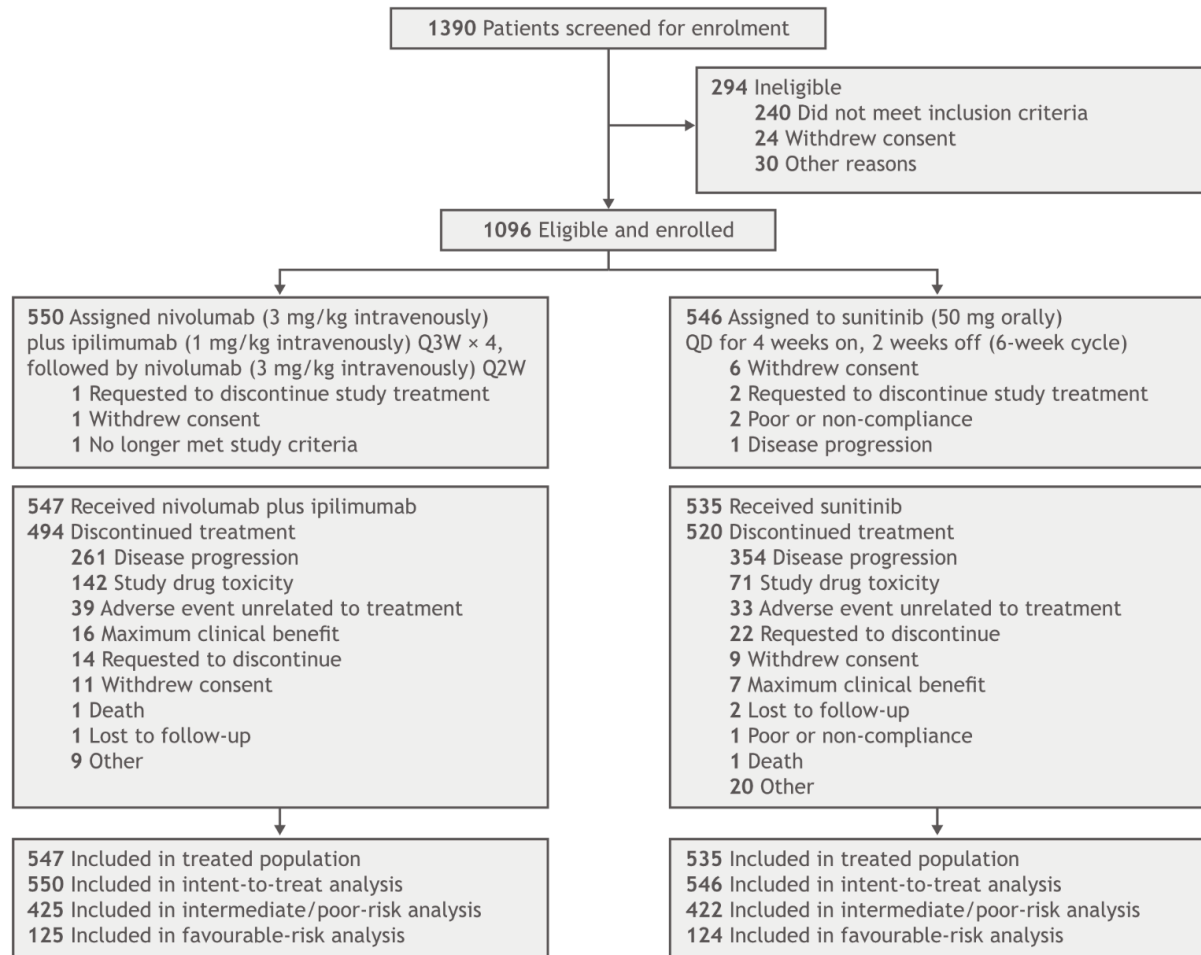

**REFERENCES**

1. Motzer RJ, Rini BI, McDermott DF, *et al.* Nivolumab plus ipilimumab versus sunitinib in first-line treatment for advanced renal cell carcinoma: extended follow-up of efficacy and safety results from a randomised, controlled, phase 3 trial. *Lancet Oncol* 2019;20:1370-85.
2. Motzer RJ, Tannir NM, McDermott DF, *et al.* Nivolumab plus ipilimumab versus sunitinib in advanced renal-cell carcinoma. *N Engl J Med* 2018;378:1277-90.
